# Supplementary material for: Does Tomato Breeding for Improved Performance Under LED Supplemental Lighting Make Sense?
Source: Research Square preprint supplement (doi:10.21203/rs.3.rs-916820/v1), 2021-10-20
Supplement: Supplementary file 1 [file f7a0d3356d9a28af66edf41c.xlsx]

## Sheet: Sheet1
Condition	Internode length	Number of trusses per plant in week 17	Number of fruits per plant in week 17	Number of trusses per plant in week 25	Number of fruits per plant in week 25	Fresh fruit weight, averaged per plant	Fruit yield (ripe)	Fruit yield (ripe + unripe)	Dry matter of the fruits, averaged per plant
	cm	-	-	-	-	g per fruit	kg per plant	kg per plant	%
HPS	60.4 ± 1.0	5.12 ± 0.12	14.6 ± 0.4	12.0 ± 0.3	35.3 ± 1.0	248.8 ± 6.4	6.01 ± 0.14	7.72 ± 0.19	4.03 ± 0.04
LED	57.0 ± 1.1	4.70 ± 0.10	13.5 ± 0.3	9.8 ± 0.2	29.5 ± 0.8	268.0 ± 6.3	5.09 ± 0.11	7.30 ± 0.16	3.99 ± 0.04
